# Supplementary material
Source: Springer Nature journal article supplement (https://www.springermedizin.de/resource/supplementary/12935_2010_283_MOESM3_ESM.pdf/9540308)

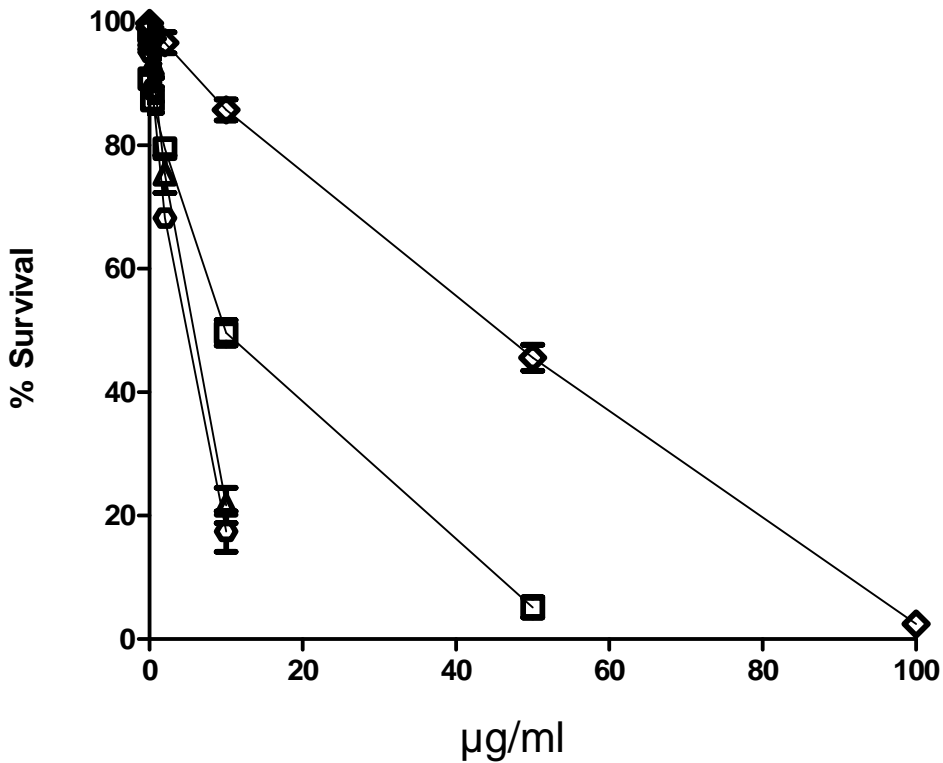

- BMR-76
- MZC-12
- ◇ PRZ-11
- △ FCN-9

Supplement: MOESM3 [file 9540308]
